# Supplementary material for: Impact of a Multidisciplinary Sepsis Initiative on Knowledge and Behavior in a Pediatric Center
Source: PubMed Central journal article supplement (PMC7190264; doi:10.1097/pq9.0000000000000267), 2020-03-10
Supplement: pqs-5-e267-s002.pdf [file pqs-5-e267-s002.pdf]

## Scenario 1

You are called to the room of Gregory, a 12 year old boy with developmental delay and autism, by his mother. She is worried because he is “starting to look worse” than a few hours ago and hasn’t urinated since admission.

### History of Present Illness

Came to the ED with “trouble breathing” that got him sent home early from school.  
Tactile fever last night, but felt/looked ‘ok’ this morning per Mom so got on the bus.  
No home medications or allergies.

### ED Course

**No IV** as PO intake reportedly ‘close to normal’ at home  
Labs sent, given Tylenol for 38.9°C orally  
Rapid screen for influenza A was *positive*  
Needed O<sub>2</sub> by facemask intermittently so admitted to monitor respiratory status

### Current Vital Signs

Temperature: 39.1°C (Axillary) Heart Rate: 155 Blood Pressure: 122/94 SpO<sub>2</sub>: 94% (Room Air) Respiratory rate: 32

### Physical Exam

Appears agitated, making groaning sounds that Mom says are a little worse than baseline  
Breathing quickly, appears labored with use of accessory muscles  
Pulses thready, 1+ in right/left wrists, capillary refill 6 seconds

### Labs

WBC count of 19.2, 80% lymphocytes  
Sodium 145, K 5.4, Cl 100, HCO<sub>3</sub> 16, BUN 20, SCR 0.8, glucose 80

**What does this patient have?** SIRS (high HR and fever) + viral infection = **SEPSIS**

**SEPSIS** + cardiovascular dysfunction (poor UOP and delayed CR) + depressed mental status = **SEVERE SEPSIS**

### Interventions: Start the SEVERE SEPSIS PROTOCOL:

UB|MD PEDIATRICS Women and Children’s Hospital of Buffalo  
**Pediatric Severe Sepsis Protocol** Women & Children’s Hospital of Buffalo  
A Kaleida Health Facility

| Minutes | Goals for time 0-15 min (check off the box as completed):                                                            | Performed by: |
|---------|----------------------------------------------------------------------------------------------------------------------|---------------|
| 0 to 15 | <input type="checkbox"/> Cardiac monitor attached                                                                    | ALL           |
|         | <input type="checkbox"/> Supplemental oxygen started via facemask at 100%                                            | ALL           |
|         | <input type="checkbox"/> Start sepsis order set                                                                      | RN, RRT       |
|         | <input type="checkbox"/> Peripheral intravenous (PIV) line started and draw labs                                     | RRT, MD, RN   |
|         | <input type="checkbox"/> Place Intraosseous (IO) line if no PIV after 3 attempts or 10 minutes                       | MD            |
|         | <input type="checkbox"/> STAT labs: blood culture, CBC with differential, VBG, glucose, electrolytes, lactate, iStat | RN, RRT       |
|         | <input type="checkbox"/> Administer 1 <sup>st</sup> 20cc/kg NS or LR IV/IO bolus via push/pull over 10 min           | RN            |

**Recheck vitals and perfusion**

**STOP**

|                                                               |                                                                        |
|---------------------------------------------------------------|------------------------------------------------------------------------|
| If still abnormal or patient ill appearing, continue protocol | If vitals normalized and patient well appearing, discontinue protocol. |
|---------------------------------------------------------------|------------------------------------------------------------------------|

### Key Learning Points

1. “Sepsis” just means ‘SIRS’ with an infection. It does not matter if that infection is **viral**, bacterial, or fungal!
2. Children with developmental problems can be hard to diagnose with sepsis. Some signs and symptoms (high heart rate, agitation) might be ‘normal for them’ sometimes. This just means we need to keep an even closer eye on these patients.
3. Trust your instincts! Almost everyone gets tachycardia and/or tachypnea when they have a fever. **Ask about mental status, urine output, mottling, and perfusion.** These should NOT change much at all with a simple fever.

| SYSTEMATIC INFLAMMATORY RESPONSE SYNDROME (SIRS)           | SEPSIS                           | SEVERE SEPSIS              | SEPTIC SHOCK                                                                                       |
|------------------------------------------------------------|----------------------------------|----------------------------|----------------------------------------------------------------------------------------------------|
| ↑ or ↓ WBC<br>OR<br>Bands >10%<br>OR<br>Temp <36,<br>>38.5 | Elevated HR<br>OR<br>Elevated RR | SIRS<br>+<br>ANY INFECTION | SEPSIS<br>+<br>Cardiovascular dysfunction<br>OR<br>Respiratory failure<br>OR<br>≥2 organ failures† |
| +                                                          |                                  | ↓                          | SEPSIS<br>+<br>Cardiovascular dysfunction*<br>(*after adequate fluid resuscitation)                |

| Systemic Inflammatory Response Syndrome (SIRS) criteria: |              |     |               |                            |
|----------------------------------------------------------|--------------|-----|---------------|----------------------------|
| Age group                                                | HR           | RR  | WBC           | SBP < 5 <sup>th</sup> %ile |
| 0-7 days                                                 | >180 or <100 | >50 | >34           | <60                        |
| 8-30 days                                                | >180 or <100 | >40 | <5 or >19.5   | <65                        |
| 31 days to <2 years                                      | >180 or <90  | >34 | <5 or >17.5   | <70                        |
| 2 to <6 years                                            | >140         | >22 | <6 or >15.5   | <75                        |
| 6 to <13 years                                           | >130         | >18 | <4.5 or >13.5 | <85                        |
| >13 years                                                | >110         | >14 | <4.5 or >11   | <90                        |

Goldstein et al. CCM 2005;6(1):2-6.

| Organ Failure Criteria†                                      |                                                   |                                   |                                 |                                             |                            |                          |
|--------------------------------------------------------------|---------------------------------------------------|-----------------------------------|---------------------------------|---------------------------------------------|----------------------------|--------------------------|
| This organ is affected if <u>any</u> of the following occur: |                                                   |                                   |                                 |                                             |                            |                          |
| <b>Cardiovascular</b>                                        | SBP < 5 <sup>th</sup> %ile for age                | OR<br>2 or more of the following: | Base Deficit > -5 mEq/L         | Lactate > 4mmol/L                           | Urine <0.5ml/kg/hr         | Capillary refill > 5 sec |
| <b>Respiratory</b>                                           | Needing CPAP or BIPAP or invasive mechanical vent |                                   | OR<br>FiO2>50% to keep SpO2>92% | OR<br>PaCO2>65 mmHg<br>OR PvCO2 > 70        | OR<br>PaO2:FiO2 ratio ≤300 |                          |
| <b>Kidney</b>                                                | SCr > 2 times normal for age                      |                                   |                                 | OR SCr > 2 times higher than baseline       |                            |                          |
| <b>Liver</b>                                                 | Tbili > 4mg/dL                                    |                                   |                                 | OR ALT > 2 times higher than normal for age |                            |                          |
| <b>Hematologic</b>                                           | Platelets < 80x 10 <sup>3</sup> /mCL              |                                   |                                 | OR INR > 2                                  |                            |                          |
| <b>Neurologic</b>                                            | GCS ≤ 11 without sedation                         |                                   |                                 | OR Decrease in mental status from baseline  |                            |                          |

| Age                           | Excessive tachycardia when at each body temperature |                    |      |      |      |                        |      |      | SBP 5%ILE FOR AGE           |
|-------------------------------|-----------------------------------------------------|--------------------|------|------|------|------------------------|------|------|-----------------------------|
|                               | 37.8                                                | 38.3               | 38.9 | 39.4 | 40   | 40.6                   | 41.1 | 41.7 |                             |
| < 2 years *                   | >180                                                | >185               | >190 | >195 | >200 | >205                   | >210 | >215 | <30 days: 60<br>1mo- 2y: 70 |
| 2 - 5 years                   | >140                                                | 145                | 150  | 155  | 160  | 165                    | 170  | 175  | 75                          |
| 6 - 12 years                  | >130                                                | 135                | 140  | 145  | 150  | 155                    | 160  | 165  | 85                          |
| 13 - 18 years                 | >110                                                | 115                | 120  | 125  | 130  | 135                    | 140  | 145  | 90                          |
| *Also qualify if bradycardic: |                                                     | < 1 month: HR <100 |      |      |      | 1 - 23 months: HR < 90 |      |      |                             |
