# Supplementary material for: Impact of a Multidisciplinary Sepsis Initiative on Knowledge and Behavior in a Pediatric Center
Source: PubMed Central journal article supplement (PMC7190264; doi:10.1097/pq9.0000000000000267), 2020-03-10
Supplement: pqs-5-e267-s003.pdf [file pqs-5-e267-s003.pdf]

# WCHOB Sepsis Survey

Please complete the survey below.

Thank you!

---

What is your role in patient care?

- Physician - Resident
- Physician - Fellow
- Physician - Attending
- Nurse
- Respiratory Therapist
- Nurse Practitioner
- Physician's Assistant

---

Did you take the original PRESS (sepsis) survey?

- Yes
- No

---

Attending Physicians Please indicate your division:

- Emergency Medicine
- General Pediatrics
- Critical Care

---

Resident Physicians Please indicate your division:

- Emergency Medicine
- General Pediatrics

---

Fellow Physicians Please indicate your division:

- Emergency Medicine
- Critical Care

---

Residents and Fellows What is your current level of training?

- PGY-1
- PGY-2
- PGY-3
- PGY-4
- PGY-5
- PGY-6
- PGY-7 or greater

---

Nurses What is your primary care team/area?\*If you split time, choose where you spend the majority\*

- Emergency Department
- Inpatient General Pediatrics wards
- PICU
- STAT team
- Other

---

Respiratory Therapists What is your primary care team/area?\*If you split time, choose where you spend the majority\*

- Emergency Department
- Inpatient General Pediatrics wards
- PICU
- STAT team
- Other

---

Nurse Practitioners and Physician's Assistants What is your primary care team/area?

- Emergency Department
- PICU
- Other

---

Other:

\_\_\_\_\_

---

How many years have you been in practice (out of school/training)?

- Less than 3
- 3-6
- 7-9
- 10 or more

How many years have you been at Women and Children's Hospital of Buffalo (training and/or in practice)?

- Less than 3  
 3-6  
 7-9  
 10 or more

How do you think Women and Children's Hospital of Buffalo compares to other U.S. pediatric centers in sepsis care?

- Among the best (top 10%)  
 Above average (upper 25%)  
 Average  
 Below average (lower 25%)  
 Among the worst (bottom 10%)

How do you think Women and Children's Hospital of Buffalo compares to other U.S. pediatric centers in septic shock care?

- Among the best (top 10%)  
 Above average (upper 25%)  
 Average  
 Below average (lower 25%)  
 Among the worst (bottom 10%)

Does Women and Children's Hospital of Buffalo have a protocol for care of patients with severe sepsis or septic shock?

- Yes  
 No  
 Not sure

Does Women and Children's Hospital of Buffalo have a specialized order set for patients with severe sepsis or septic shock?

- Yes  
 No  
 Not sure

How often have you used the severe sepsis order set in the care of your patients?

- Never  
 Rarely  
 Sometimes  
 Frequently  
 Always

Which are some reasons you have not used the severe sepsis order set in the past? Select all that apply

- What's a sepsis order set?  
 I forget  
 Not easy to find the order set in the EMR  
 Not easy to find what I need when I open the order set  
 Already doing most/all of what it says already  
 My patients, though technically "septic," are not sick enough to warrant all those labs/meds/interventions  
 Other

Other:

---

Which of the following do you think make it difficult to recognize sepsis and/or septic shock in children? \*Choose all that apply

- Viral infection  
 Lack of a positive culture  
 Developmental delay  
 Complex medical history  
 Many previous admissions for similar issues  
 Kids have a wide range of "normal" vitals, labs  
 Coworker discouragement  
 Easy to dismiss signs/symptoms (e.g. fever 'not real' in a bundled neonate)  
 Diagnostic fatigue ("Everything looks like sepsis")  
 Lack of familiarity with the diagnostic criteria  
 Other

Other:

---

**Please indicate your level of agreement with the following statements:**

|                                                                                                                   | Strongly Disagree     | Somewhat Disagree     | Neither agree nor disagree | Somewhat Agree        | Strongly Agree        |
|-------------------------------------------------------------------------------------------------------------------|-----------------------|-----------------------|----------------------------|-----------------------|-----------------------|
| Women and Children's Hospital of Buffalo excels at diagnosing sepsis                                              | <input type="radio"/> | <input type="radio"/> | <input type="radio"/>      | <input type="radio"/> | <input type="radio"/> |
| Women and Children's Hospital of Buffalo excels at diagnosing septic shock                                        | <input type="radio"/> | <input type="radio"/> | <input type="radio"/>      | <input type="radio"/> | <input type="radio"/> |
| Women and Children's Hospital of Buffalo excels at treating sepsis                                                | <input type="radio"/> | <input type="radio"/> | <input type="radio"/>      | <input type="radio"/> | <input type="radio"/> |
| Women and Children's Hospital of Buffalo excels at treating septic shock                                          | <input type="radio"/> | <input type="radio"/> | <input type="radio"/>      | <input type="radio"/> | <input type="radio"/> |
| Providers in Women and Children's Hospital of Buffalo use clear and consistent definitions of sepsis/septic shock | <input type="radio"/> | <input type="radio"/> | <input type="radio"/>      | <input type="radio"/> | <input type="radio"/> |

**How often do you HESITATE TO NOTIFY other providers about a possible sepsis/septic shock patient for the following reasons...**

|                                                                | Never                 | Rarely                | Sometimes             | Frequently            | Very frequently/Always |
|----------------------------------------------------------------|-----------------------|-----------------------|-----------------------|-----------------------|------------------------|
| Concerns over a negative response from coworkers               | <input type="radio"/> | <input type="radio"/> | <input type="radio"/> | <input type="radio"/> | <input type="radio"/>  |
| Prior discouragement from making these diagnoses               | <input type="radio"/> | <input type="radio"/> | <input type="radio"/> | <input type="radio"/> | <input type="radio"/>  |
| Worries about alarming patients, families, or co-workers       | <input type="radio"/> | <input type="radio"/> | <input type="radio"/> | <input type="radio"/> | <input type="radio"/>  |
| Worries about making "too big a deal" in case you are mistaken | <input type="radio"/> | <input type="radio"/> | <input type="radio"/> | <input type="radio"/> | <input type="radio"/>  |
| Wish to avoid using these "labels"                             | <input type="radio"/> | <input type="radio"/> | <input type="radio"/> | <input type="radio"/> | <input type="radio"/>  |

**How often do you CHOOSE NOT TO NOTIFY other providers about a possible sepsis/septic shock patient for the following reasons...**

|                                                              | Never                 | Rarely                | Sometimes             | Frequently            | Very<br>Frequently/Always |
|--------------------------------------------------------------|-----------------------|-----------------------|-----------------------|-----------------------|---------------------------|
| Concern over a negative response from coworkers              | <input type="radio"/> | <input type="radio"/> | <input type="radio"/> | <input type="radio"/> | <input type="radio"/>     |
| Prior discouragement from making these diagnoses             | <input type="radio"/> | <input type="radio"/> | <input type="radio"/> | <input type="radio"/> | <input type="radio"/>     |
| Worry about alarming patients, families, or co-workers       | <input type="radio"/> | <input type="radio"/> | <input type="radio"/> | <input type="radio"/> | <input type="radio"/>     |
| Worry about making "too big a deal" in case you are mistaken | <input type="radio"/> | <input type="radio"/> | <input type="radio"/> | <input type="radio"/> | <input type="radio"/>     |
| Wish to avoid using these "labels"                           | <input type="radio"/> | <input type="radio"/> | <input type="radio"/> | <input type="radio"/> | <input type="radio"/>     |

**Please indicate your level of agreement with the following statements:**

**"I AM COMFORTABLE..."**

|                                                                                      | Strongly Disagree     | Somewhat Disagree     | Neither Agree or Disagree | Somewhat Agree        | Strongly Agree        |
|--------------------------------------------------------------------------------------|-----------------------|-----------------------|---------------------------|-----------------------|-----------------------|
| ...alerting a COWORKER my patient might be septic"                                   | <input type="radio"/> | <input type="radio"/> | <input type="radio"/>     | <input type="radio"/> | <input type="radio"/> |
| ...alerting a SUPERVISOR or ATTENDING PHYSICIAN my patient might be septic"          | <input type="radio"/> | <input type="radio"/> | <input type="radio"/>     | <input type="radio"/> | <input type="radio"/> |
| ...alerting a COWORKER my patient might be in septic shock"                          | <input type="radio"/> | <input type="radio"/> | <input type="radio"/>     | <input type="radio"/> | <input type="radio"/> |
| ...alerting a SUPERVISOR or ATTENDING PHYSICIAN my patient might be in septic shock" | <input type="radio"/> | <input type="radio"/> | <input type="radio"/>     | <input type="radio"/> | <input type="radio"/> |
| ...identifying septic shock in my patient when their blood pressure is NORMAL"       | <input type="radio"/> | <input type="radio"/> | <input type="radio"/>     | <input type="radio"/> | <input type="radio"/> |
| ...identifying septic shock in my patient when their blood pressure is ABNORMAL"     | <input type="radio"/> | <input type="radio"/> | <input type="radio"/>     | <input type="radio"/> | <input type="radio"/> |

**You are called to the bedside of each of the following patients. Based on your understanding of the pediatric criteria, please indicate whether each has sepsis.**

3 y/o male with nephrotic syndrome admitted for worsening edema, acute on chronic renal failure secondary to medication non-compliance. Temperature: 38.7°C orally Heart rate: 150 beats/min Respiratory rate: 50 breaths/min Blood pressure: 140/95 Capillary refill: 4-5 seconds, mottled with pitting edema Pulses: 2+ central, 1+ peripheral WBC count: 14.4, with 70% neutrophils, 20% lymphocytes Urinalysis: 3+ protein, 3+ hemoglobin, many WBC, + leuk esterase, + nitrites, many bacteria

- Yes, this patient has sepsis  
 No, this patient does not meet sepsis criteria  
 Unsure

6 year old male s/p MVA (motor vehicle accident), pedestrian vs. car. Admitted with liver laceration to the ICU for serial blood counts. No other injuries. Temperature: 38.1°C orally Heart rate: 175 beats/min Respiratory rate: 36 breaths/min Blood pressure: 132/60 Capillary refill: 3 seconds Pulses: 3+, central and peripheral WBC count: 5.7, with 88% neutrophils, 10% lymphocytes Hemoglobin: 6.3

- Yes, this patient has sepsis  
 No, this patient does not meet sepsis criteria  
 Unsure

14 year old male with influenza A on viral screening. Bacterial cultures negative, no antibiotics. Temperature: 39.0°C orally Heart rate: 165 beats/min Respiratory rate: 18 breaths/min Blood pressure: 110/65 Capillary refill: < 2 seconds Pulses: 2+, central and peripheral WBC count: 7.4, with 70% lymphocytes, 20% neutrophils

- Yes, this patient has sepsis  
 No, this patient does not meet sepsis criteria  
 Unsure

12 y/o male with global developmental delay and autism, admitted for "trouble breathing" and hypoxemia. Improved on nasal cannula, now on 2L/min. Temperature: 39.1°C orally Heart rate: 155 beats/min Respiratory rate: 32 breaths/min, SpO2: 95% Blood pressure: 122/94 Capillary refill: 5 seconds Pulses: 1+, central and peripheral WBC count: 19.2, with 80% lymphocytes, 16% neutrophils

- Yes, this patient has sepsis  
 No, this patient does not meet sepsis criteria  
 Unsure

**You are called to the bedside to evaluate the following patients. If all have received 40ml/kg of intravenous fluids in the last hour, would they meet the criteria for SEPTIC SHOCK based on the information provided?**

3 y/o male with pneumococcal pneumonia on high-flow nasal cannula. Appears in mild distress, minimal accessory muscle use and subcostal retractions. Tired and cranky but appropriately interactive. Temperature: 38.8°C rectally, 38.5°C axillary Heart rate: 110 beats/min Respiratory rate: 20 breaths/min Blood pressure: 110/50 Urine output of 1.5mL/kg/hr over last 12 hours WBC count: 18.1, with 85% neutrophils, 12% immature neutrophils (bands) Arterial blood gas: pH of 7.39, CO2 of 40, base deficit of -0.5 Platelets: 75,000/mm<sup>3</sup> Serum creatinine: 1.2 mg/dL (baseline 0.5 mg/dL)

- Yes, this patient has septic shock  
 No, this patient does not meet criteria for septic shock  
 Unsure

6 year old female with a history of ALL (acute lymphoblastic leukemia), receiving chemotherapy. Admitted with one day of fever and vomiting. Sleepy but answers questions appropriately. Temperature: 39.7°C orally, 36.5°C axillary Heart rate: 120 beats/min Respiratory rate: 18 breaths/min Blood pressure: 108/60 Capillary refill: 6 seconds Urine output of 0.4mL/kg/hr over last 12 hours WBC count: 0.4 Arterial blood gas: pH of 7.30, CO2 of 32, base deficit of -6 Platelets of 100,000/mm<sup>3</sup> Serum creatinine normal

- Yes, this patient has septic shock  
 No, this patient does not meet criteria for septic shock  
 Unsure

19 day old female with RSV, on ampicillin and cefotaxime while blood, urine, and CSF cultures pending. Temperature: 38.7°C rectally Heart rate: 190 beats/min Respiratory rate: 48 breaths/min Blood pressure: 90/44 Capillary refill: > 5 seconds Pulses: 1+, central and peripheral, mottled skin Urine output of 0.2mL/kg/hr over last 12 hours WBC count: 32.6 with 82% neutrophils, 10% lymphocytes Arterial blood gas: pH of 7.33, CO2 of 22, base deficit of -9 Platelets of 280,000/mm<sup>3</sup> Serum creatinine 0.7

- Yes, this patient has septic shock  
 No, this patient does not meet criteria for septic shock  
 Unsure



**Please answer the next few questions about sepsis drills and our efforts to date so we can better serve you and our patients:**

Have you participated in any sepsis drills in the past year?  Yes  No

Approximately how many?  1 or 2  3-5  6 or more

How valuable do you feel sepsis drills are to our education?  Very much  Moderately  Somewhat  Little  Not at all

What have you learned from your participation in sepsis drills? Choose all that apply

- Definitions for sepsis, severe sepsis and septic shock
- That we have a severe sepsis protocol at WCHOB
- What the severe sepsis protocol contains
- How to recognize early signs of severe sepsis or septic shock
- How to treat patients with severe sepsis or septic shock
- Nothing, I already knew everything discussed
- Other

Other: \_\_\_\_\_

Which of the following would be helpful educational platforms? Choose all that apply

- Grand Rounds
- Online modules/quizzes
- Talent Management
- Small-group discussions
- More sepsis drills!
- Simulation/Mock code sessions
- Other

Other: \_\_\_\_\_

**In your experience, how have the following aspects of the sepsis "culture" at Women and Children's Hospital of Buffalo changed over the past year?**

|                                                                | Improved significantly | Improved somewhat     | No change             | Gotten somewhat worse | Gotten significantly worse |
|----------------------------------------------------------------|------------------------|-----------------------|-----------------------|-----------------------|----------------------------|
| Sepsis and shock awareness                                     | <input type="radio"/>  | <input type="radio"/> | <input type="radio"/> | <input type="radio"/> | <input type="radio"/>      |
| Prompt sepsis recognition                                      | <input type="radio"/>  | <input type="radio"/> | <input type="radio"/> | <input type="radio"/> | <input type="radio"/>      |
| Prompt shock recognition                                       | <input type="radio"/>  | <input type="radio"/> | <input type="radio"/> | <input type="radio"/> | <input type="radio"/>      |
| Prompt sepsis treatment                                        | <input type="radio"/>  | <input type="radio"/> | <input type="radio"/> | <input type="radio"/> | <input type="radio"/>      |
| Prompt shock treatment                                         | <input type="radio"/>  | <input type="radio"/> | <input type="radio"/> | <input type="radio"/> | <input type="radio"/>      |
| Collaboration and communication about sepsis between providers | <input type="radio"/>  | <input type="radio"/> | <input type="radio"/> | <input type="radio"/> | <input type="radio"/>      |
| Staff education                                                | <input type="radio"/>  | <input type="radio"/> | <input type="radio"/> | <input type="radio"/> | <input type="radio"/>      |
| Overall quality of care of patients with sepsis                | <input type="radio"/>  | <input type="radio"/> | <input type="radio"/> | <input type="radio"/> | <input type="radio"/>      |
